# Supplementary material for: Photo-induced charge separation in hydroxycoumarins on TiO2 and F–TiO2
Source: Royal Society of Chemistry journal article supplement (doi:10.1039/c9dt01455a), 2019-01-01
Supplement: c9dt01455a1.pdf [file c9dt01455a1.pdf]

### Supporting materials

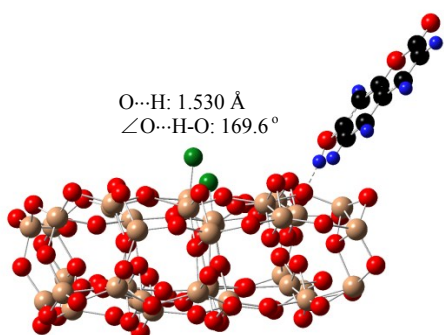

Figure S1. The optimized structure of 7-CN<sup>+</sup>&F-TiO<sub>2</sub> with 7-CN<sup>+</sup> interacting with the bridging oxygen atom. The calculated H-bonding property is shown in the figure. H, blue; O, red; C, black; Ti, gold; F, green.

Table S1. Isotropic proton coupling constants for 7-CN<sup>+</sup>&F-TiO<sub>2</sub> with 7-CN<sup>+</sup> interacting with the bridging oxygen atom.

| Atom       | Gauss  |
|------------|--------|
| H at C3    | -8.012 |
| H at C4    | 2.511  |
| H at C5    | 1.191  |
| H at C6    | -4.313 |
| H at C8    | -1.259 |
| H at C7-OH | -3.279 |

Table S2. Anisotropic proton coupling constants for **7-CN<sup>+</sup>&F-TiO<sub>2</sub>** with **7-CN<sup>+</sup>** interacting with the bridging oxygen atom.

| Atom       |     | Gauss  |
|------------|-----|--------|
| H at C3    | Baa | -4.808 |
|            | Bbb | -0.361 |
|            | Bcc | 5.180  |
| H at C4    | Baa | -1.052 |
|            | Bbb | -0.473 |
|            | Bcc | 1.522  |
| H at C5    | Baa | -0.841 |
|            | Bbb | -0.183 |
|            | Bcc | 1.020  |
| H at C6    | Baa | -2.648 |
|            | Bbb | -0.548 |
|            | Bcc | 3.212  |
| H at C8    | Baa | -0.719 |
|            | Bbb | -0.702 |
|            | Bcc | 1.423  |
| H at C7-OH | Baa | -3.218 |
|            | Bbb | -1.751 |
|            | Bcc | 4.972  |
